# Supplementary material for: Climate change will reduce suitable Caatinga dry forest habitat for endemic plants with disproportionate impacts on specialized reproductive strategies
Source: PubMed Central journal article supplement (PMC6541362; doi:10.1371/journal.pone.0217028), 2019-05-29
Supplement: pone.0217028.s001.pdf [file pone.0217028.s001.pdf]

| <b>N</b> | <b>Title</b>                                                                                                                       | <b>Authors</b>                                                           | <b>Year</b> | <b>Journal</b>                          | <b>Vol.</b> | <b>Pages</b> |
|----------|------------------------------------------------------------------------------------------------------------------------------------|--------------------------------------------------------------------------|-------------|-----------------------------------------|-------------|--------------|
| 1        | Regeneração natural em um remanescente de Caatinga sob diferentes níveis de perturbação, no agreste paraibano                      | Pereira IM, Andrade LA, Costa JRM, Dias JM                               | 2001        | Acta Botanica Brasilica                 | 15 (3)      | 413-426      |
| 2        | Composição florística e análise fitossociológica do componente arbustivo-arbóreo de um remanescente florestal no agreste paraibano | Pereira IM, Andrade LA, Barbosa MRV, Sampaio EVSB                        | 2002        | Acta Botanica Brasilica                 | 16 (3)      | 357-369      |
| 3        | Use-history effects on structure and flora of Caatinga                                                                             | Pereira IM, Andrade LA, Sampaio EVSB, Barbosa MRV                        | 2003        | Biotropica                              | 35 (2)      | 154-165      |
| 4        | Floral traits and pollination systems in the Caatinga, a Brazilian Tropical Dry Forest                                             | Machado IC & Lopes AV                                                    | 2004        | Annals of Botany                        | 94          | 365-376      |
| 5        | Plant sexual systems and a review of the breeding system Studies in the Caatinga, a Brazilian Tropical Dry Forest                  | Machado IC, Lopes AV & Sazima M                                          | 2006        | Annals of Botany                        | 97          | 277-287      |
| 6        | Diversidade e estrutura fitossociológica da Caatinga na Estação Ecológica do Seridó-RN                                             | Santana JAS & Souto JS                                                   | 2006        | Revista de Biologia e Ciências da Terra | 6 (2)       | 232-242      |
| 7        | Effects grazing by steers and a long drought on a caatinga ligneous stratum in semi-arid northeast, Brazil                         | Albuquerque SG, Soares JGG & Filho CG                                    | 2008        | Revista Caatinga                        | 21 (4)      | 17-28        |
| 8        | Sítios de estabelecimento e relações alométricas em populações lenhosas da Caatinga                                                | Figueiredo LS, Ferraz EMN, Rodal MJN, Pimentel RMM, Araújo EL            | 2010        | Revista de Geografia                    | 27 (2)      | 155-167      |
| 9        | Levantamento florístico e fitossociológico em fragmentos de Caatinga no Município de Taboleiro Grande-RN                           | Bessa MAP & Medeiros JF                                                  | 2011        | GeoTemas                                | 1 (2)       | 69-83        |
| 10       | Angiosperms from the Araripe National Forest, Ceará, Brazil                                                                        | Ribeiro-Silva S, Medeiros MB, Gomes BM, Seixas ENC, Silva MAP            | 2012        | Checklist                               | 8 (4)       | 744-751      |
| 11       | Composição florística da RPPN Fazenda Almas, no Cariri Paraibano, Paraíba, Brasil                                                  | Lima IB & Barbosa MRV                                                    | 2014        | Revista Nordestina de Biologia          | 23 (1)      | 49-67        |
| 12       | Flora vascular de um inselbergue na mesorregião do sertão paraibano, nordeste do Brasil                                            | Lucena DS, Lucena MFA, Souza JM, Silva RFL, Souza PF                     | 2014        | Scientia Plena                          | 11 (1)      | 1-11         |
| 13       | Levantamento florístico e fitossociológico em área de Caatinga manipulada durante o período chuvoso                                | Luna AA, Carneiro MSS, Furtado RN, Silva GJGM, Camapanha MM, Medeiros HR | 2015        | Revista Científica de Produção Animal   | 17 (1)      | 41-49        |
| 14       | Levantamento florístico de um trecho de mata ciliar na mesorregião do Sertão Paraibano                                             | Silva FG, Silva RH, Araújo RM, Araújo MF, Sousa JM                       | 2015        | Revista Brasileira de Botânica          | 13 (4)      | 250-258      |
| 15       | Estrutura da vegetação em dois fragmentos de Caatinga Antropizada na Paraíba                                                       | Sabino FGS, Cunha MCL, Santana GM                                        | 2016        | Floresta e Ambiente                     | 23 (4)      | 487-497      |
| 16       | Levantamento florístico de um trecho de mata ciliar na mesorregião do Sertão Paraibano                                             | Santos WS, Souza MP, Nóbrega GFQ, Medeiros, FS, Alves AR, Holanda AC     | 2017        | Revista Nativa                          | 5 (2)       | 85-91        |
