# Supplementary material for: Climate change will reduce suitable Caatinga dry forest habitat for endemic plants with disproportionate impacts on specialized reproductive strategies
Source: PubMed Central journal article supplement (PMC6541362; doi:10.1371/journal.pone.0217028), 2019-05-29
Supplement: pone.0217028.s002.pdf [file pone.0217028.s002.pdf]

**Table S2. Number of endemic plant species to Caatinga dry forest per georeferenced point and per trait.**

| Point | Coordinates |          | Total species | Traits    |               |                     |             |                      |                                 |                 |         |  |
|-------|-------------|----------|---------------|-----------|---------------|---------------------|-------------|----------------------|---------------------------------|-----------------|---------|--|
|       | Lat         | Long     |               | Habit     |               | Pollination systems |             | Reproductive systems |                                 | Dispersal modes |         |  |
|       |             |          |               | Arboreous | Non-arboreous | Generalists         | Specialized | Self-compatible      | Self-incompatible/<br>Dioecious | Biotic          | Abiotic |  |
| 1     | -9          | -38      | 8             | 4         | 4             | 1                   | 6           | 1                    | 2                               | 3               | 4       |  |
| 2     | -10         | -39      | 5             | 3         | 2             | 1                   | 4           | 1                    | 3                               | 2               | 3       |  |
| 3     | -8,5        | -38      | 5             | 3         | 2             | 1                   | 4           | 3                    | 1                               | 3               | 2       |  |
| 4     | -12,7167    | -39,7    | 4             | 3         | 1             | 1                   | 2           | 0                    | 2                               | 1               | 3       |  |
| 5     | -12,6167    | -38,2833 | 1             | 1         | 0             | 0                   | 1           | 0                    | 1                               | 0               | 1       |  |
| 6     | -7,11667    | -40,9667 | 7             | 0         | 7             | 4                   | 3           | 1                    | 0                               | 2               | 5       |  |
| 7     | -5,46667    | -40,8667 | 5             | 1         | 4             | 3                   | 1           | 1                    | 2                               | 1               | 3       |  |
| 8     | -5,71667    | -40,9167 | 5             | 1         | 4             | 3                   | 1           | 1                    | 2                               | 1               | 3       |  |
| 9     | -7,81667    | -38,0333 | 5             | 1         | 4             | 3                   | 2           | 1                    | 1                               | 3               | 2       |  |
| 10    | -7,86667    | -38,1833 | 5             | 1         | 4             | 3                   | 2           | 1                    | 1                               | 3               | 2       |  |
| 11    | -7,95       | -38,2833 | 5             | 2         | 3             | 2                   | 2           | 1                    | 2                               | 1               | 4       |  |
| 12    | -7,98333    | -38,3167 | 5             | 2         | 3             | 2                   | 2           | 1                    | 2                               | 1               | 4       |  |
| 13    | -9,11667    | -37,1833 | 3             | 3         | 0             | 1                   | 2           | 0                    | 2                               | 0               | 2       |  |
| 14    | -8,65       | -37,5833 | 14            | 6         | 8             | 4                   | 10          | 3                    | 5                               | 3               | 14      |  |
| 15    | -8,68333    | -37,6167 | 14            | 6         | 8             | 4                   | 10          | 3                    | 5                               | 3               | 14      |  |
| 16    | -13,7667    | -41,05   | 6             | 5         | 1             | 2                   | 2           | 0                    | 1                               | 1               | 5       |  |
| 17    | -14         | -41,1667 | 6             | 5         | 1             | 2                   | 2           | 0                    | 1                               | 1               | 5       |  |
| 18    | -3,90944    | -40,99   | 1             | 0         | 1             | 1                   | 0           | 1                    | 0                               | 0               | 1       |  |
| 19    | -8,40306    | -37,3583 | 7             | 4         | 3             | 0                   | 7           | 1                    | 4                               | 2               | 5       |  |
| 20    | -6,88111    | -35,7947 | 4             | 2         | 2             | 2                   | 2           | 2                    | 1                               | 1               | 3       |  |
| 21    | -6,88111    | -35,795  | 6             | 3         | 3             | 3                   | 3           | 2                    | 2                               | 2               | 4       |  |

|    |          |          |    |   |   |   |   |   |   |   |   |
|----|----------|----------|----|---|---|---|---|---|---|---|---|
| 22 | -8,44722 | -42,3297 | 2  | 1 | 1 | 1 | 1 | 0 | 0 | 0 | 2 |
| 23 | -8,90639 | -42,7642 | 2  | 1 | 1 | 1 | 1 | 0 | 0 | 0 | 2 |
| 24 | -9,15    | -42,7    | 3  | 3 | 0 | 2 | 1 | 0 | 1 | 0 | 3 |
| 25 | -8,23833 | -35,9222 | 4  | 2 | 2 | 2 | 2 | 2 | 1 | 1 | 3 |
| 26 | -7,81667 | -38,1833 | 2  | 0 | 2 | 2 | 0 | 1 | 0 | 1 | 1 |
| 27 | -7,98333 | -38,2833 | 6  | 4 | 2 | 1 | 4 | 2 | 3 | 3 | 3 |
| 28 | -7,16444 | -35,8603 | 2  | 1 | 1 | 1 | 1 | 1 | 0 | 1 | 1 |
| 29 | -5,17    | -37,0294 | 1  | 0 | 1 | 1 | 0 | 1 | 0 | 0 | 1 |
| 30 | -9,03333 | -40,2333 | 3  | 1 | 2 | 2 | 1 | 2 | 1 | 2 | 1 |
| 31 | -6,88944 | -35,7986 | 6  | 3 | 3 | 3 | 3 | 2 | 2 | 2 | 4 |
| 32 | -9,11667 | -37,1833 | 5  | 3 | 2 | 2 | 3 | 1 | 3 | 2 | 3 |
| 33 | -4,85    | -42,0667 | 2  | 0 | 2 | 1 | 1 | 0 | 1 | 0 | 2 |
| 34 | -8,44722 | -42,3297 | 10 | 4 | 6 | 4 | 6 | 3 | 3 | 4 | 5 |
| 35 | -8,90639 | -42,7642 | 10 | 4 | 6 | 4 | 6 | 3 | 3 | 4 | 5 |
| 36 | -8,45    | -36,7667 | 10 | 5 | 5 | 2 | 7 | 4 | 4 | 4 | 4 |
| 37 | -7,98333 | -38,3167 | 10 | 5 | 5 | 2 | 7 | 4 | 4 | 4 | 4 |
| 38 | -8,31194 | -38,1958 | 1  | 0 | 1 | 1 | 0 | 0 | 0 | 0 | 1 |
| 39 | -10,8    | -42,8333 | 8  | 3 | 5 | 5 | 3 | 2 | 1 | 2 | 4 |
| 40 | -7,4     | -36,5333 | 2  | 1 | 1 | 1 | 1 | 1 | 1 | 0 | 2 |
| 41 | -6,58333 | -37,3333 | 2  | 1 | 1 | 1 | 1 | 1 | 1 | 0 | 2 |
| 42 | -6,66667 | -37,65   | 1  | 1 | 0 | 0 | 1 | 0 | 1 | 0 | 1 |
| 43 | -5,17    | -37,0294 | 1  | 1 | 0 | 0 | 1 | 0 | 1 | 0 | 1 |
| 44 | -8,58333 | -38,6667 | 1  | 1 | 0 | 0 | 1 | 1 | 0 | 1 | 0 |
| 45 | -8,45    | -36,7667 | 4  | 2 | 2 | 1 | 3 | 1 | 2 | 2 | 1 |
| 46 | -8,58333 | -37,25   | 12 | 7 | 5 | 3 | 9 | 2 | 2 | 3 | 8 |
| 47 | -8,42639 | -36,135  | 3  | 1 | 2 | 2 | 1 | 1 | 1 | 0 | 3 |

|    |          |          |    |   |   |   |   |   |   |   |   |
|----|----------|----------|----|---|---|---|---|---|---|---|---|
| 48 | -8,23333 | -35,9167 | 1  | 0 | 1 | 0 | 0 | 0 | 0 | 1 | 0 |
| 49 | -7,9525  | -37,1519 | 3  | 2 | 1 | 1 | 1 | 2 | 0 | 2 | 1 |
| 50 | -6,58333 | -37,3333 | 4  | 2 | 2 | 2 | 2 | 1 | 2 | 0 | 4 |
| 51 | -6,66667 | -37,65   | 4  | 2 | 2 | 2 | 2 | 1 | 2 | 0 | 4 |
| 52 | -5,95167 | -36,9447 | 1  | 0 | 1 | 1 | 0 | 0 | 0 | 0 | 1 |
| 53 | -7,05267 | -36,0517 | 6  | 3 | 3 | 3 | 3 | 2 | 2 | 3 | 3 |
| 54 | -7,47083 | -36,8975 | 3  | 1 | 2 | 1 | 2 | 1 | 1 | 1 | 2 |
| 55 | -7,39667 | -36,5319 | 8  | 4 | 4 | 3 | 4 | 2 | 3 | 2 | 6 |
| 56 | -5,79278 | -37,5569 | 2  | 1 | 1 | 1 | 1 | 0 | 0 | 1 | 1 |
| 57 | -4,82611 | -38,9692 | 1  | 0 | 1 | 0 | 1 | 0 | 0 | 0 | 1 |
| 58 | -7,40694 | -39,3497 | 10 | 4 | 6 | 6 | 4 | 3 | 2 | 1 | 9 |
| 59 | -7,4     | -36,5333 | 2  | 1 | 1 | 1 | 1 | 0 | 1 | 0 | 2 |
| 60 | 14,2758  | -43,6656 | 1  | 1 | 0 | 0 | 1 | 0 | 1 | 0 | 1 |
| 61 | -6,57361 | -40,1236 | 2  | 0 | 2 | 2 | 0 | 1 | 0 | 0 | 2 |
| 62 | -6,81    | -36,9606 | 4  | 2 | 2 | 3 | 1 | 1 | 1 | 0 | 4 |
| 63 | -6,3133  | -37,433  | 3  | 1 | 2 | 2 | 1 | 1 | 1 | 0 | 3 |
| 64 | -6,85861 | -36,0153 | 8  | 5 | 3 | 4 | 3 | 2 | 2 | 3 | 5 |
| 65 | -7,5725  | -37,2192 | 8  | 5 | 3 | 4 | 3 | 2 | 2 | 3 | 5 |
| 66 | -5,57222 | -36,9092 | 2  | 0 | 2 | 2 | 0 | 1 | 0 | 0 | 2 |
| 67 | -5,7925  | -37,5567 | 3  | 1 | 2 | 2 | 1 | 1 | 1 | 0 | 3 |
| 68 | -4,95556 | -39,0244 | 2  | 1 | 1 | 2 | 0 | 1 | 1 | 0 | 2 |
| 69 | -7,01689 | -35,8806 | 1  | 1 | 0 | 0 | 1 | 1 | 0 | 1 | 0 |
| 70 | -8,31194 | -38,1958 | 6  | 5 | 1 | 1 | 4 | 1 | 3 | 3 | 3 |
| 71 | -8,61667 | -38,2833 | 4  | 1 | 3 | 2 | 2 | 1 | 2 | 1 | 3 |
| 72 | -8,3     | -38,5833 | 4  | 1 | 3 | 2 | 2 | 1 | 2 | 1 | 3 |
| 73 | -7,81667 | -38,1833 | 2  | 1 | 1 | 1 | 1 | 2 | 0 | 1 | 1 |

|    |          |          |   |   |   |   |   |   |   |   |   |
|----|----------|----------|---|---|---|---|---|---|---|---|---|
| 74 | -5,55389 | -37,8886 | 2 | 0 | 2 | 2 | 0 | 1 | 0 | 0 | 2 |
| 75 | -14,5522 | -44,2175 | 1 | 1 | 0 | 1 | 0 | 0 | 0 | 0 | 1 |
| 76 | -14,5522 | -44,2175 | 5 | 3 | 2 | 3 | 2 | 2 | 1 | 1 | 4 |
| 77 | -5,69389 | -35,8197 | 4 | 3 | 1 | 1 | 3 | 2 | 2 | 1 | 3 |
| 78 | -8,33333 | -35,8333 | 4 | 1 | 3 | 2 | 1 | 2 | 1 | 1 | 3 |
| 79 | -7,33333 | -36,3    | 4 | 1 | 3 | 3 | 1 | 2 | 1 | 0 | 4 |
| 80 | -7,39167 | -36,533  | 6 | 3 | 3 | 3 | 2 | 3 | 1 | 2 | 4 |
| 81 | -8,15    | -36,3208 | 1 | 0 | 1 | 1 | 0 | 0 | 0 | 0 | 0 |
| 82 | -6,58333 | -37,3333 | 4 | 2 | 2 | 2 | 2 | 1 | 2 | 0 | 4 |
| 83 | -6,66667 | -37,65   | 4 | 2 | 2 | 2 | 2 | 1 | 2 | 0 | 4 |
| 84 | -8,60083 | -38,5678 | 5 | 2 | 3 | 0 | 4 | 1 | 3 | 2 | 3 |
| 85 | -9,0825  | -38,2297 | 3 | 0 | 3 | 1 | 1 | 1 | 0 | 1 | 2 |
| 86 | -9,09083 | -38,2286 | 3 | 0 | 3 | 1 | 1 | 1 | 0 | 1 | 2 |
| 87 | -8,3125  | -38,1953 | 6 | 4 | 2 | 3 | 3 | 2 | 2 | 1 | 5 |
| 88 | -11,1856 | -40,4683 | 2 | 2 | 0 | 0 | 1 | 0 | 1 | 1 | 1 |
| 89 | -10,4667 | -40,1833 | 2 | 1 | 1 | 1 | 1 | 0 | 1 | 0 | 2 |
| 90 | -7,39167 | -36,5331 | 2 | 1 | 1 | 1 | 1 | 1 | 1 | 1 | 1 |
| 91 | -5,34083 | -36,8328 | 4 | 2 | 2 | 2 | 2 | 1 | 2 | 0 | 4 |
| 92 | -6,70278 | -37,7542 | 6 | 3 | 3 | 3 | 3 | 2 | 2 | 2 | 4 |
| 93 | -8,06667 | -37,2667 | 7 | 4 | 3 | 2 | 5 | 2 | 3 | 2 | 5 |
| 94 | -8,38194 | -35,8439 | 5 | 0 | 5 | 2 | 2 | 2 | 0 | 1 | 3 |
| 95 | -8,39139 | -36,0103 | 5 | 0 | 5 | 2 | 2 | 2 | 0 | 1 | 3 |
| 96 | -7,43694 | -36,9083 | 5 | 3 | 2 | 3 | 1 | 2 | 0 | 2 | 3 |
| 97 | -7,42944 | -36,9097 | 5 | 3 | 2 | 3 | 1 | 2 | 0 | 2 | 3 |
| 98 | -7,53139 | -36,5608 | 5 | 2 | 3 | 3 | 2 | 2 | 1 | 2 | 3 |
| 99 | -7,52722 | -36,5517 | 5 | 2 | 3 | 3 | 2 | 2 | 1 | 2 | 3 |

|     |          |          |    |   |    |    |   |   |   |   |    |
|-----|----------|----------|----|---|----|----|---|---|---|---|----|
| 100 | -7,42583 | -36,4892 | 6  | 3 | 3  | 4  | 1 | 3 | 0 | 2 | 4  |
| 101 | -7,42083 | -36,4881 | 6  | 3 | 3  | 4  | 1 | 3 | 0 | 2 | 4  |
| 102 | -6,60028 | -40,1208 | 9  | 2 | 7  | 5  | 4 | 3 | 2 | 1 | 8  |
| 103 | -6,74306 | -40,3167 | 9  | 2 | 7  | 5  | 4 | 3 | 2 | 1 | 8  |
| 104 | -6,85361 | -41,4708 | 10 | 5 | 5  | 4  | 6 | 1 | 3 | 2 | 8  |
| 105 | -8,03556 | -38,6667 | 9  | 4 | 5  | 3  | 6 | 3 | 2 | 4 | 5  |
| 106 | -8,13333 | -38,8    | 9  | 4 | 5  | 3  | 6 | 3 | 2 | 4 | 5  |
| 107 | -8,42639 | -36,135  | 5  | 3 | 2  | 1  | 4 | 2 | 2 | 2 | 3  |
| 108 | -8,57389 | -38,5458 | 3  | 2 | 1  | 0  | 3 | 2 | 1 | 1 | 1  |
| 109 | -7,23083 | -35,8808 | 4  | 2 | 2  | 2  | 2 | 2 | 1 | 1 | 3  |
| 110 | -7,35778 | -35,8978 | 4  | 2 | 2  | 2  | 2 | 2 | 1 | 1 | 3  |
| 111 | -7,52    | -36,0269 | 4  | 2 | 2  | 2  | 2 | 2 | 1 | 1 | 3  |
| 112 | -7,42    | -35,9997 | 4  | 2 | 2  | 2  | 2 | 2 | 1 | 1 | 3  |
| 113 | -5,14557 | -40,9278 | 3  | 0 | 3  | 2  | 1 | 1 | 1 | 0 | 2  |
| 114 | -5,1455  | -40,9278 | 3  | 0 | 3  | 2  | 1 | 1 | 1 | 0 | 2  |
| 115 | -5,14556 | -40,283  | 3  | 0 | 3  | 2  | 1 | 1 | 1 | 0 | 2  |
| 116 | -5,25    | -40,25   | 22 | 5 | 17 | 12 | 7 | 8 | 6 | 3 | 15 |
| 117 | -5       | -41      | 22 | 5 | 17 | 12 | 7 | 8 | 6 | 3 | 15 |
| 118 | -9,15    | -42,3667 | 2  | 2 | 0  | 0  | 2 | 0 | 2 | 0 | 2  |
| 119 | -3,68333 | -40,3333 | 5  | 4 | 1  | 3  | 2 | 2 | 2 | 4 | 1  |
| 120 | -8,575   | -36,8792 | 7  | 4 | 3  | 1  | 5 | 2 | 3 | 3 | 3  |
| 121 | -14,4244 | -44,1719 | 3  | 1 | 2  | 2  | 1 | 1 | 1 | 0 | 1  |
| 122 | -7,15058 | -35,9754 | 4  | 1 | 3  | 3  | 1 | 0 | 2 | 2 | 2  |
| 123 | -5,93    | -38,0344 | 6  | 3 | 3  | 3  | 3 | 3 | 2 | 1 | 5  |
| 124 | -7,195   | -39,2244 | 3  | 1 | 2  | 2  | 1 | 2 | 0 | 2 | 0  |
| 125 | -7,47722 | -39,56   | 3  | 1 | 2  | 2  | 1 | 2 | 0 | 2 | 0  |

|            |          |          |    |   |   |   |   |   |   |   |    |
|------------|----------|----------|----|---|---|---|---|---|---|---|----|
| <b>126</b> | -5,42611 | -35,3836 | 2  | 2 | 0 | 0 | 2 | 1 | 1 | 1 | 1  |
| <b>127</b> | -7,47083 | -36,8975 | 16 | 7 | 9 | 6 | 9 | 5 | 5 | 6 | 10 |
| <b>128</b> | -7,06194 | -37,2997 | 7  | 3 | 4 | 4 | 3 | 3 | 1 | 1 | 5  |
| <b>129</b> | -3,7     | -40,35   | 2  | 2 | 0 | 1 | 1 | 0 | 2 | 0 | 2  |
| <b>130</b> | -6,47917 | -37,4561 | 2  | 2 | 0 | 0 | 2 | 1 | 1 | 1 | 1  |
| <b>131</b> | -7,08278 | -37,2603 | 3  | 2 | 1 | 1 | 2 | 2 | 1 | 1 | 2  |
| <b>132</b> | -5,49944 | -37,3411 | 5  | 3 | 2 | 3 | 2 | 1 | 3 | 0 | 5  |

---
