# Supplementary material for: Climate change will reduce suitable Caatinga dry forest habitat for endemic plants with disproportionate impacts on specialized reproductive strategies
Source: PubMed Central journal article supplement (PMC6541362; doi:10.1371/journal.pone.0217028), 2019-05-29
Supplement: pone.0217028.s003.pdf [file pone.0217028.s003.pdf]

|                                | Current v. RCP 4.5      |                |          | Current v. RCP 8.5      |                |          |
|--------------------------------|-------------------------|----------------|----------|-------------------------|----------------|----------|
|                                | Adjusted R <sup>2</sup> | <i>t</i> value | <i>P</i> | Adjusted R <sup>2</sup> | <i>t</i> value | <i>P</i> |
| <b>Endemic</b>                 | 0.03164                 | 1.396          | 0.17     | -0.276                  | 0.469          | 0.64     |
| <b>Habit</b>                   |                         |                |          |                         |                |          |
| Arboreous                      | 0.2602                  | 3.346          | 0.00     | 0.1749                  | 2.673          | 0.01     |
| Non-arboreous                  | 0.4038                  | 4.543          | 0.00     | 0.6497                  | 7.402          | 0.00     |
| <b>Pollination system</b>      |                         |                |          |                         |                |          |
| Generalist                     | 0.6023                  | 6.702          | 0.00     | 0.8491                  | 12.813         | 0.00     |
| Specialist                     | 0.2134                  | 2.978          | 0.00     | 0.6483                  | 7.379          | 0.00     |
| <b>Reproductive system</b>     |                         |                |          |                         |                |          |
| Self-compatible                | 0.6547                  | 7.483          | 0.00     | 0.5781                  | 6.383          | 0.00     |
| Self-incompatible/<br>Dioceous | 0.4645                  | 5.114          | 0.00     | 0.1799                  | 2.714          | 0.01     |
| <b>Dispersal mode</b>          |                         |                |          |                         |                |          |
| Abiotic                        | 0.3238                  | 3.858          | 0.00     | 0.4851                  | 5.322          | 0.00     |
| Biotic                         | -0.01092                | 0.829          | 0.41     | 0.00575                 | 1.081          | 0.29     |
